# Supplementary material
Source: Springer Nature journal article supplement (https://www.springermedizin.de/resource/supplementary/12885_2013_5259_MOESM7_ESM.pdf/9465254)

**A** MTT assay MiaPaCa-2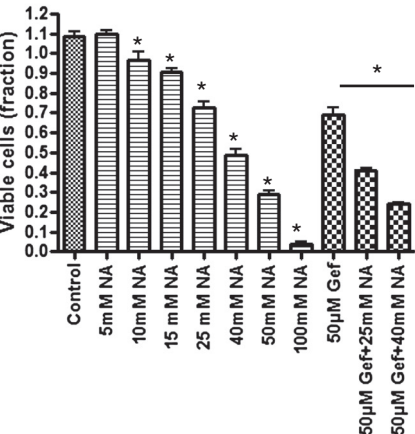**B** MTT assay PANC-1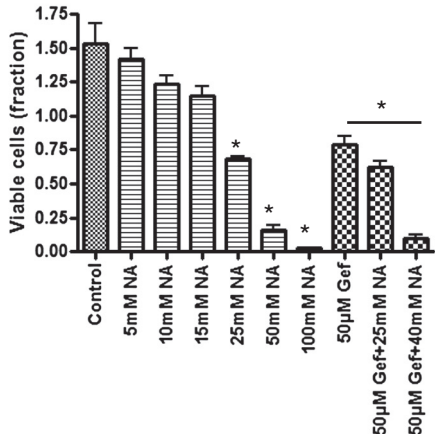

Supplement: MOESM7 [file 9465254]
